# Supplementary material
Source: Springer Nature journal article supplement (https://mijn.bsl.nl/resource/supplementary/13047_2009_96_MOESM8_ESM.pdf/7109684)

### Normal-arched screening protocol

|                                                                                 |                                         |
|---------------------------------------------------------------------------------|-----------------------------------------|
| Is at least one clinical measurement within the range for a normal-arched feet? |                                         |
| Arch index                                                                      | Normalised navicular height (truncated) |
| 0.20–0.28                                                                       | 0.24–0.30                               |

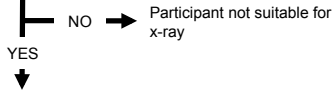

Are all radiographic measurements within range for normal-arched foot?  
(Mean ± 1 SD)

| CIA         |             | C1MA          |               | TNCA       |            | TSMA       |            |
|-------------|-------------|---------------|---------------|------------|------------|------------|------------|
| Males       | Females     | Males         | Females       | Males      | Females    | Males      | Females    |
| 17.9°–25.4° | 17.2°–23.3° | 128.1°–136.1° | 129.3°–137.4° | 1.8°–19.3° | 6.7°–21.7° | 5.5°–20.5° | 8.4°–18.8° |

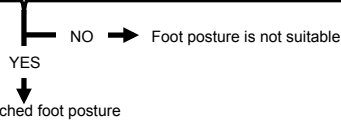

### Flat-arched screening protocol

|                                                                             |                                         |
|-----------------------------------------------------------------------------|-----------------------------------------|
| Is at least one clinical measurement greater than 2SD from the normal mean? |                                         |
| Arch index                                                                  | Normalised navicular height (truncated) |
| > 0.32                                                                      | < 0.21                                  |

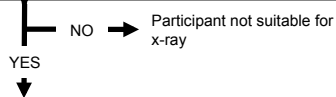

Is CIA and C1MA and / or TNCA and T2MA radiographic measurements greater than 1SD from the normal-arched mean?

| CIA     |         | C1MA     |          | TNCA    |         | TSMA    |         |
|---------|---------|----------|----------|---------|---------|---------|---------|
| Males   | Females | Males    | Females  | Males   | Females | Males   | Females |
| < 17.9° | < 17.2° | > 136.1° | > 137.4° | > 19.3° | > 21.7° | > 20.5° | > 18.8° |

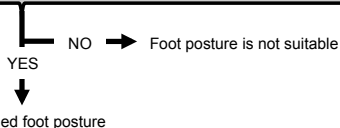

Supplement: MOESM8 [file 7109684]
